# Supplementary material for: Hierarchical Pt-In Nanowires for Efficient Methanol Oxidation Electrocatalysis
Source: MDPI journal article supplement (doi:10.3390/molecules28031502), 2023-02-03
Supplement: s1 [file s1]

# Hierarchical Pt-In Nanowires for Efficient Methanol Oxidation Electrocatalysis

Zhao Lu <sup>1</sup>, Lu Zou <sup>2</sup> and Wulin Song <sup>1,2,\*</sup>

<sup>1</sup> Analytical and Testing Center of Huazhong University of Science and Technology, Wuhan 430074, China

<sup>2</sup> State Key Laboratory of Materials Processing and Die & Mould Technology,  
Huazhong University of Science and Technology, 1037 Luoyu Road, Wuhan 430074, China

\* Correspondence: wulins@126.com; Tel.: +86-027-875592025

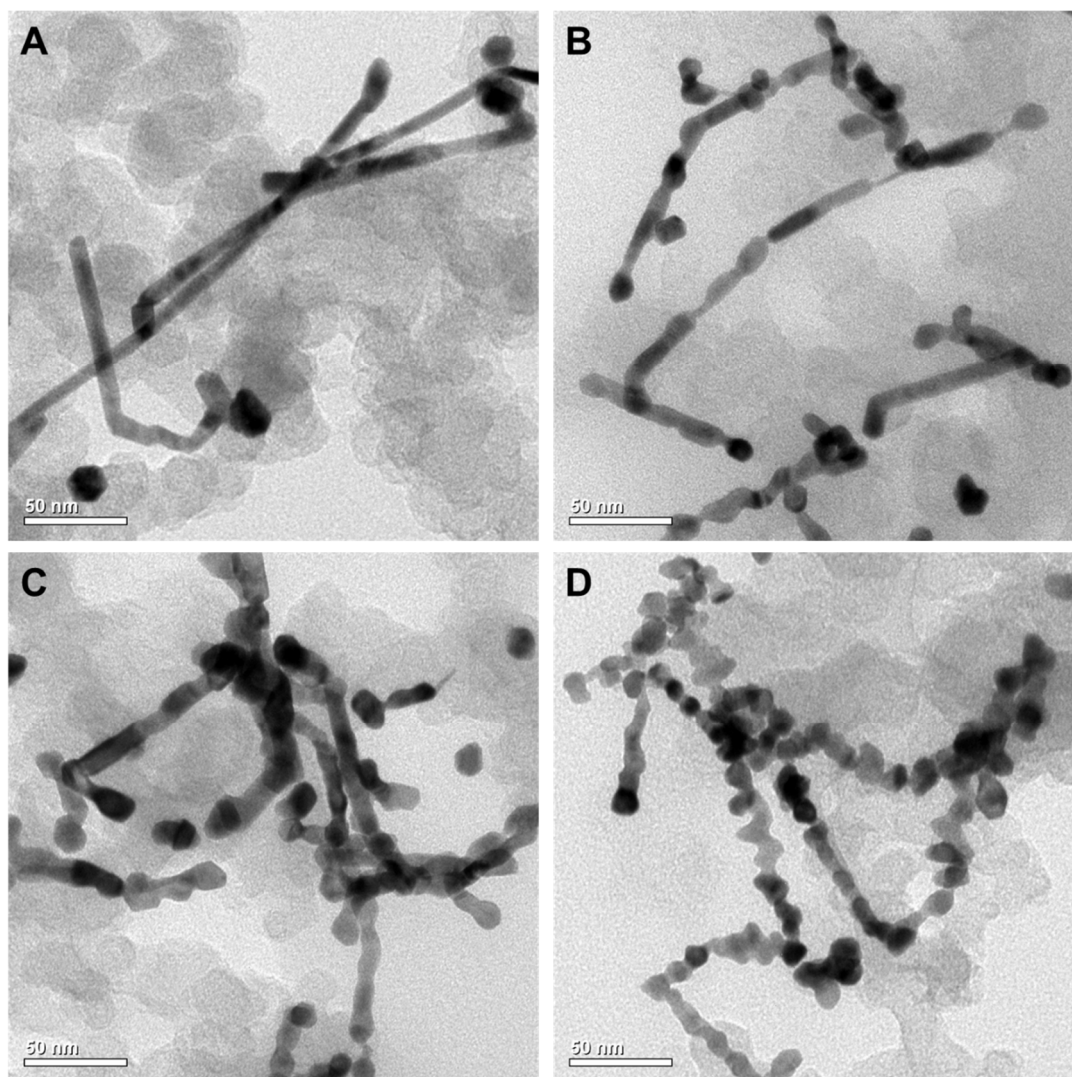

**Figure S1.** TEM images of carbon supported (A) Pt NWs, (B) Pt<sub>94</sub>In<sub>6</sub> NWs, (C) Pt<sub>89</sub>In<sub>11</sub> NWs, and (D) Pt<sub>78</sub>In<sub>22</sub> NWs.

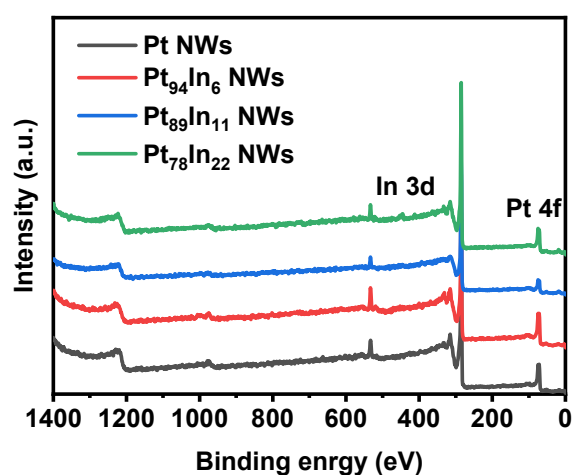

Figure S2. XPS survey spectra of Pt and Pt-In NWs.

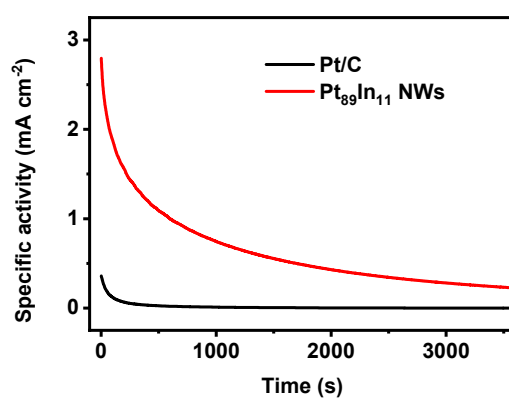

Figure S3. I-t curves of Pt/C and Pt<sub>89</sub>In<sub>11</sub> NWs.

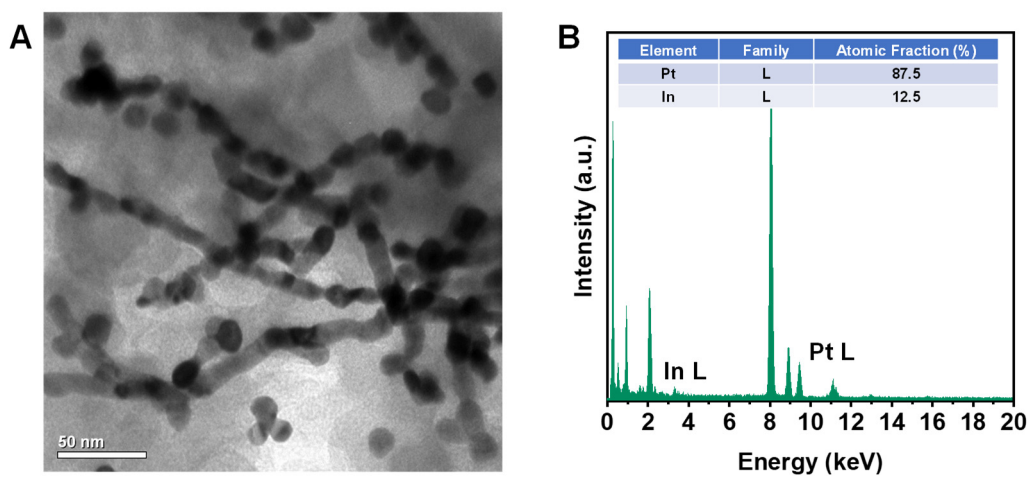

Figure S4. (A) TEM image, and (B) TEM-EDS profile of Pt<sub>89</sub>In<sub>11</sub> NWs after stability test.

**Table S1.** MOR activity of Pt alloy catalysts in recent reports.

| Catalyst                                                   | MA<br>(A mg <sup>-1</sup> Pt) | SA<br>(mA cm <sup>-2</sup> ) | Electrolytes                                        | Ref.             |
|------------------------------------------------------------|-------------------------------|------------------------------|-----------------------------------------------------|------------------|
| <b>Pt<sub>89</sub>In<sub>11</sub> NWs</b>                  | <b>1.42</b>                   | <b>6.2</b>                   | <b>0.1 M HClO<sub>4</sub> + 0.5 M Methanol</b>      | <b>This Work</b> |
| PtRu <sub>2</sub> Fe Nanowires                             | NA                            | 2.27                         | 0.1 M HClO <sub>4</sub> + 0.5 M Methanol            | [1]              |
| Pt Nanosheets                                              | 0.27                          | 0.57                         | 0.5 M H <sub>2</sub> SO <sub>4</sub> + 1 M Methanol | [2]              |
| PtPb/Pt Nanoplates/C                                       | 1.50                          | 2.70                         | 0.1 M HClO <sub>4</sub> + 0.1 M Methanol            | [3]              |
| PtCu <sub>2.1</sub> Nanowires/C                            | 1.56                          | 3.31                         | 0.1 M HClO <sub>4</sub> + 0.2 M Methanol            | [4]              |
| PtRu Nanowires/C                                           | 0.82                          | 1.16                         | 0.1 M HClO <sub>4</sub> + 0.5 M Methanol            | [5]              |
| PtRu Nanodendrites                                         | 1.08                          | 10.08                        | 0.1 M HClO <sub>4</sub> + 1 M Methanol              | [6]              |
| Co-PtCu Nanoframes/C                                       | 4.11                          | 7.09                         | 0.1 M HClO <sub>4</sub> + 1 M Methanol              | [7]              |
| PtRuCu Hexapods                                            | 1.35                          | 3.91                         | 0.1 M HClO <sub>4</sub> + 1 M Methanol              | [8]              |
| Pd <sub>0.97</sub> Ru <sub>0.44</sub> Pt Nanowire Networks | 1.10                          | 1.98                         | 0.1 M HClO <sub>4</sub> + 0.5 M Methanol            | [9]              |
| PtCoNiRh Nanowires/C                                       | 1.36                          | 2.08                         | 0.1 M HClO <sub>4</sub> + 0.5 M Methanol            | [10]             |
| f-Pt <sub>2</sub> Cu <sub>1</sub> Nanowires                | 1.14                          | 2.78                         | 0.1 M HClO <sub>4</sub> + 0.5 M Methanol            | [11]             |
| Pt <sub>3</sub> Sn Intermetallic Nanocubes                 | 2.19                          | 4.00                         | 0.1 M HClO <sub>4</sub> + 1 M Methanol              | [12]             |

**References:**

1. Scofield, M.E.; Koenigsmann, C.; Wang, L.; Liu, H.; Wong, S.S. Tailoring the composition of ultrathin, ternary alloy PtRuFe nanowires for the methanol oxidation reaction and formic acid oxidation reaction. *Energ Environ. Sci.* **2015**, *8*, 350–363.
2. Chhetri, M.; Rana, M.; Loukya, B.; Patil, P.K.; Datta, R.; Gautam, U.K. Mechanochemical Synthesis of Free-Standing Platinum Nanosheets and Their Electrocatalytic Properties. *Adv. Mater.* **2015**, *27*, 4430–4437.
3. Bu, L.; Zhang, N.; Guo, S.; Zhang, X.; Li, J.; Yao, J.; Wu, T.; Lu, G.; Ma, J.-Y.; Su, D.; et.al Biaxially strained PtPb/Pt core/shell nanoplate boosts oxygen reduction catalysis. *Electrocatalysis*. **2016**, *354*, 1410–1414.
4. Zhang, N.; Bu, L.; Guo, S.; Guo, J.; Huang, X. Screw Thread-Like Platinum-Copper Nanowires Bounded with High-Index Facets for Efficient Electrocatalysis. *Nano Lett.* **2016**, *16*, 5037–5043.
5. Huang, L.; Zhang, X.; Wang, Q.; Han, Y.; Fang, Y.; Dong, S. Shape-Control of Pt-Ru Nanocrystals: Tuning Surface Structure for Enhanced Electrocatalytic Methanol Oxidation. *J. Am. Chem Soc.* **2018**, *140*, 1142–1147.
6. Lu, S.; Eid, K.; Ge, D.; Guo, J.; Wang, L.; Wang, H.; Gu, H. One-pot synthesis of PtRu nanodendrites as efficient catalysts for methanol oxidation reaction. *Nanoscale*. **2017**, *9*, 1033–1039.
7. Kwon, T.; Jun, M.; Kim, H.Y.; Oh, A.; Park, J.; Baik, H.; Joo, S.H.; Lee, K. Vertex-Reinforced PtCuCo Ternary Nanoframes as Efficient and Stable Electrocatalysts for the Oxygen Reduction Reaction and the Methanol Oxidation Reaction. *Adv. Funct. Mater.* **2018**, *28*, 1706440.
8. Xue, S.; Deng, W.; Yang, F.; Yang, J.; Amiin, I.S.; He, D.; Tang, H.; Mu, S. Hexapod PtRuCu Nanocrystalline Alloy for Highly Efficient and Stable Methanol Oxidation. *ACS Catal.* **2018**, *8*, 7578–7584.
9. Shang, C.; Guo, Y.; Wang, E. Facile fabrication of PdRuPt nanowire networks with tunable compositions as efficient methanol electrooxidation catalysts. *Nano Res.* **2018**, *11*, 4348–4355.
10. Wang, W.; Chen, X.; Zhang, X.; Ye, J.; Xue, F.; Zhen, C.; Liao, X.; Li, H.; Li, P.; Liu, M.; et.al Quaternary Pt-based ultrathin nanowires intensified by Rh enable highly active and robust electrocatalysts for methanol oxidation. *Nano Energy*. **2020**, *71*, 104623.
11. Wang, K.; Huang, D.; Guan, Y.; Liu, F.; He, J.; Ding, Y. Fine-tuning the electronic structure of dealloyed PtCu nanowires for efficient methanol oxidation reaction. *ACS Catal.* **2021**, *11*, 14428–14438.

12. Chen, H.-S.; Benedetti, T.M.; Lian, J.; Cheong, S.; O'Mara, P.B.; Sulaiman, K.O.; Kelly, C.H.W.; Scott, R.W.J.; Gooding, J.J.; Tilley, R.D. Role of the Secondary Metal in Ordered and Disordered Pt-M Intermetallic Nanoparticles: An Example of Pt<sub>3</sub>Sn Nanocubes for the Electrocatalytic Methanol Oxidation. *ACS Catal.* **2021**, *11*, 2235–2243.
